# Supplementary material for: Functionalization of graphene by tetraphenylethylene using nitrene chemistry
Source: Royal Society of Chemistry journal article supplement (doi:10.1039/c2ra20460f), 2012-01-01
Supplement: c2ra20460f.pdf [file c2ra20460f.pdf]

## Electronic Supplementary Information (ESI)

# Functionalization of graphene by tetraphenylethylene using nitrene chemistry

Xiujuan Xu,<sup>a</sup> Wei Lv,<sup>b</sup> Jing Huang,<sup>a</sup> Jijun Li,<sup>c</sup> Runli Tang,<sup>a</sup> Jiawei Yan,<sup>c</sup> Quanhong Yang,<sup>b</sup> Jingui Qin<sup>a</sup> and Zhen Li<sup>\*a</sup>

<sup>a</sup> Department of Chemistry, Hubei Key Lab on Organic and Polymeric Opto-Electronic Materials, Wuhan University, Wuhan, 430072, China. Fax: +86-27-6875-6757; Phone: +86-27-6225-4108; E-mail: [lizhen@whu.edu.cn](mailto:lizhen@whu.edu.cn) or [lichemlab@163.com](mailto:lichemlab@163.com).

<sup>b</sup> Key Laboratory for Green Chemical Technology of Ministry of Education, School of Chemical Engineering and Technology, Tianjin University, Tianjin 300072, China.

<sup>c</sup> State Key Laboratory for Physical Chemistry of Solid Surfaces and Department of Chemistry, College of Chemistry and Chemical Engineering, Xiamen University, Xiamen, Fujian 361005, China.

## Experimental Section

### Synthesis and Characterization

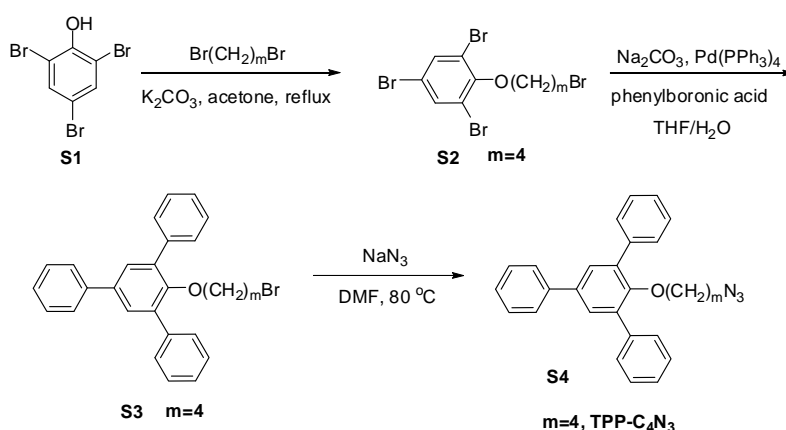

### Synthesis of Compound S3

S1, S2, and S3 were prepared according to our previous work<sup>1</sup> except 1,4-dibromobutane was used

instead of 1-bromobutane. A colorless oil was obtained in 96% (1.01g).  $^1\text{H}$  NMR ( $\text{CDCl}_3$ , 300 MHz),  $\delta$ (TMS, ppm): 7.66 (m, 6H, Ar-H), 7.56 (s, 2H, Ar-H), 7.47-7.34 (m, 9H, Ar-H), 3.24 (t,  $J = 11.4$  Hz, 2H, -O-CH<sub>2</sub>-), 3.00 (t,  $J = 13.5$  Hz, 2H, -CH<sub>2</sub>-Br), 1.52 (m, 2H, -CH<sub>2</sub>-), 1.33 (m, 2H, -CH<sub>2</sub>-).

### Synthesis of Compound S4

The procedure was similar to that of **TPE-C<sub>4</sub>N<sub>3</sub>**. A white solid was obtained in 92% (852 mg).  $^1\text{H}$  NMR ( $\text{CDCl}_3$ , 300 MHz),  $\delta$ (TMS, ppm): 7.65 (m, 6H, Ar-H), 7.57 (s, 2H, Ar-H), 7.45-7.37 (m, 9H, Ar-H), 3.24 (t, 2H, -O-CH<sub>2</sub>-), 2.87 (t, 2H, -CH<sub>2</sub>-N<sub>3</sub>), 1.24 (m, 4H, -CH<sub>2</sub>-).

### Synthesis of Compound PB-Cl

1-pyrenebutyric acid (577 mg, 2 mM), 2-chloroethanol (169 mg, 2.1 mM), dicyclohexylcarbodiimide (DCC) (825 mg, 4 mM), and 4-(N,N'-dimethyl)aminopyridine (DMAP) (73 mg, 0.6 mM) were dissolved in dry  $\text{CH}_2\text{Cl}_2$  (50 mL) and stirred at room temperature for 24 h. The precipitate was filtered and the crude product was purified by column chromatography using chloroform/petroleum ether (1/5, v/v) to afford a yellow solid (652 mg, 93%).  $^1\text{H}$  NMR ( $\text{CDCl}_3$ , 300 MHz),  $\delta$ (TMS, ppm): 8.29 (d, 1H, Ar-H), 8.18-8.11 (m, 4H, Ar-H), 8.04-7.97 (m, 3H, Ar-H), 7.88 (d, 1H, Ar-H), 4.35 (t, 2H, -O-CH<sub>2</sub>-), 3.69 (t,  $J = 10.8$  Hz, 2H, -CH<sub>2</sub>-Cl-), 3.41 (t,  $J = 15$  Hz, 2H, Ar-CH<sub>2</sub>-), 2.52 (t,  $J = 14.1$  Hz, 2H, -CH<sub>2</sub>-CO-), 2.22 (m, 2H, -CH<sub>2</sub>-).

### Synthesis of Compound PB-N<sub>3</sub>

The procedure was similar to that of **TPE-C<sub>4</sub>N<sub>3</sub>**. A yellow solid was obtained in 90% (530 mg).  $^1\text{H}$  NMR ( $\text{CDCl}_3$ , 300 MHz),  $\delta$ (TMS, ppm): 8.32 (d, 1H, Ar-H), 8.18-8.11 (m, 4H, Ar-H), 8.04-7.97 (m, 3H, Ar-H), 7.87 (d, 1H, Ar-H), 4.25 (t, 2H, -O-CH<sub>2</sub>-), 3.69 (t, 2H, -CH<sub>2</sub>-N<sub>3</sub>-), 3.45 (t, 2H, Ar-CH<sub>2</sub>-), 2.52 (t, 2H, -CH<sub>2</sub>-CO-), 2.17 (m, 2H, -CH<sub>2</sub>-).

### Syntheses of PB-G and TPP-C<sub>4</sub>N<sub>3</sub>-G.

The procedures were similar to that of **TPE-C<sub>4</sub>N<sub>3</sub>-G**.

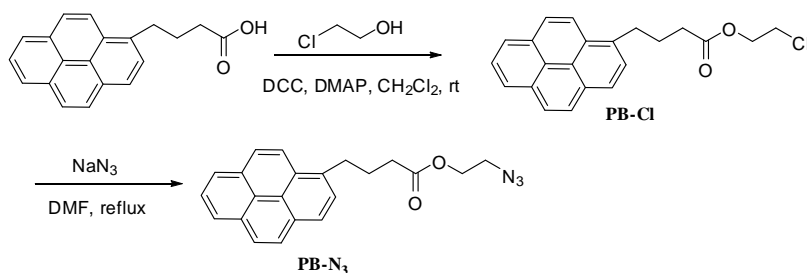

**Figure S1.** Synthetic routes to **PB-N<sub>3</sub>**.

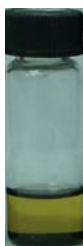

**Figure S2.** Photograph of the reaction system of **PB-G**, which was taken after one week.

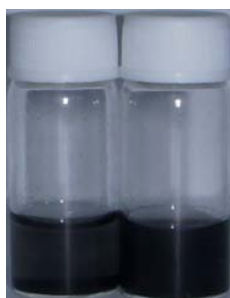

**Figure S3.** Photographs of graphene (left) and **TPE-C<sub>4</sub>N<sub>3</sub>-G-In** (right) in THF, both of the samples were prepared by sonication for 5 seconds, and the photographs were taken after 30 min.

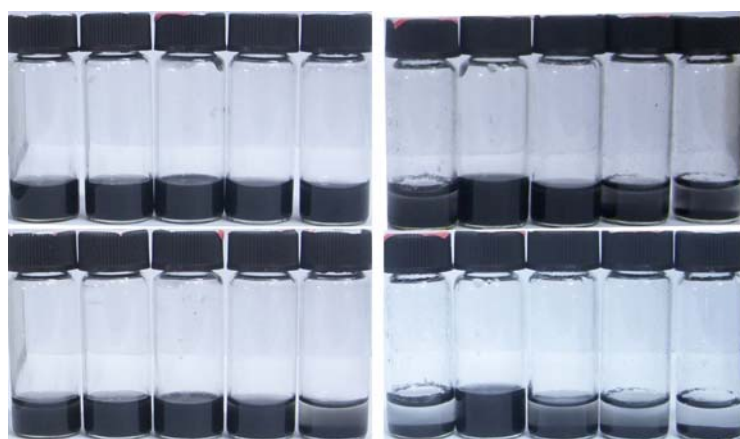

**Figure S4.** Dispersion stabilities of **TPE-C<sub>4</sub>N<sub>3</sub>-G-In** (left) and graphene (right) in toluene, DMF, CHCl<sub>3</sub>, ethanol and acetone (from left to right) without sonication. The samples on the top were taken as soon as prepared, and the bottom ones were taken after 15 min. Concentrations: 1 mg/mL.

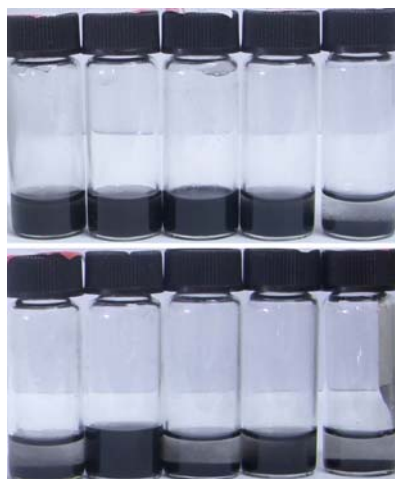

**Figure S5.** Dispersion stabilities of **TPE-C<sub>4</sub>N<sub>3</sub>-G-In** (top) and graphene (bottom) in toluene, DMF, CHCl<sub>3</sub>, ethanol and acetone (from left to right) with sonication for 5 min. The photographs were taken 1 hour later. Concentrations: 1 mg/mL.

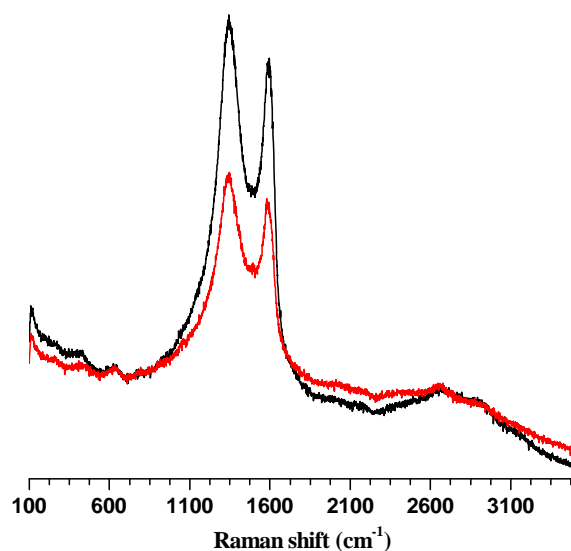

**Figure S6.** Raman spectra of graphene (black) and **TPE-C<sub>4</sub>N<sub>3</sub>-G-In** (red).

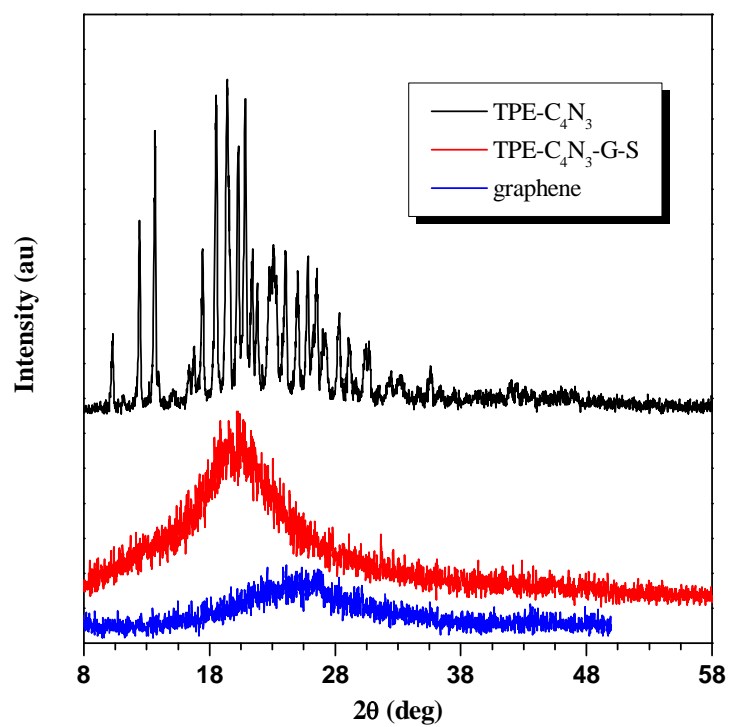

**Figure S7.** XRD patterns of TPE-C<sub>4</sub>N<sub>3</sub>, graphene and TPE-C<sub>4</sub>N<sub>3</sub>-G-S.

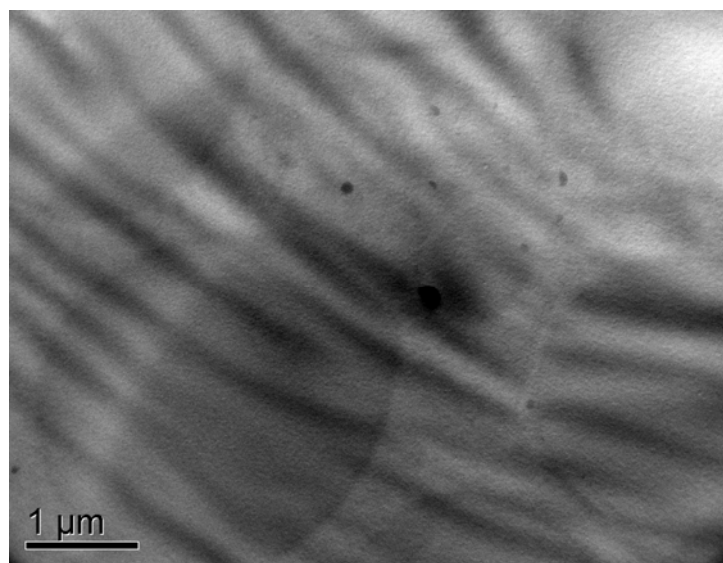

**Figure S8.** TEM image of TPE-C<sub>4</sub>N<sub>3</sub>.

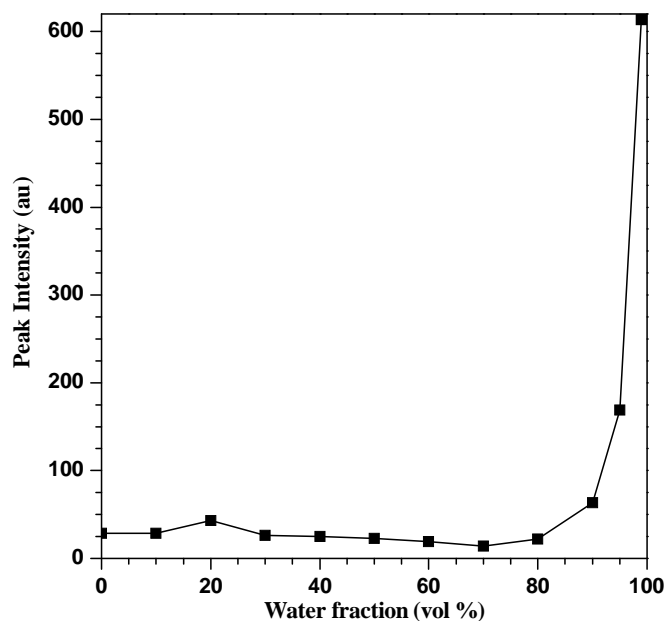

**Figure S9.** Changes in the PL peak intensities of **TPE-C<sub>4</sub>N<sub>3</sub>** with different water fractions in the H<sub>2</sub>O/THF mixture. Concentrations: 10  $\mu$ M. Excitation wavelength: 330 nm.

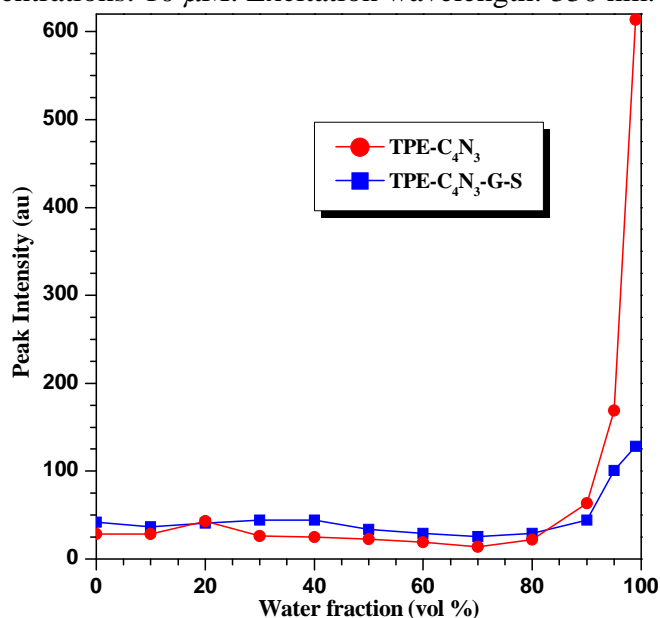

**Figure S10.** Changes in the PL peak intensities of **TPE-C<sub>4</sub>N<sub>3</sub>-G-S** and **TPE-C<sub>4</sub>N<sub>3</sub>** with different water fractions in the H<sub>2</sub>O/THF mixture. Concentrations: 10  $\mu$ M. Excitation wavelength: 330 nm.

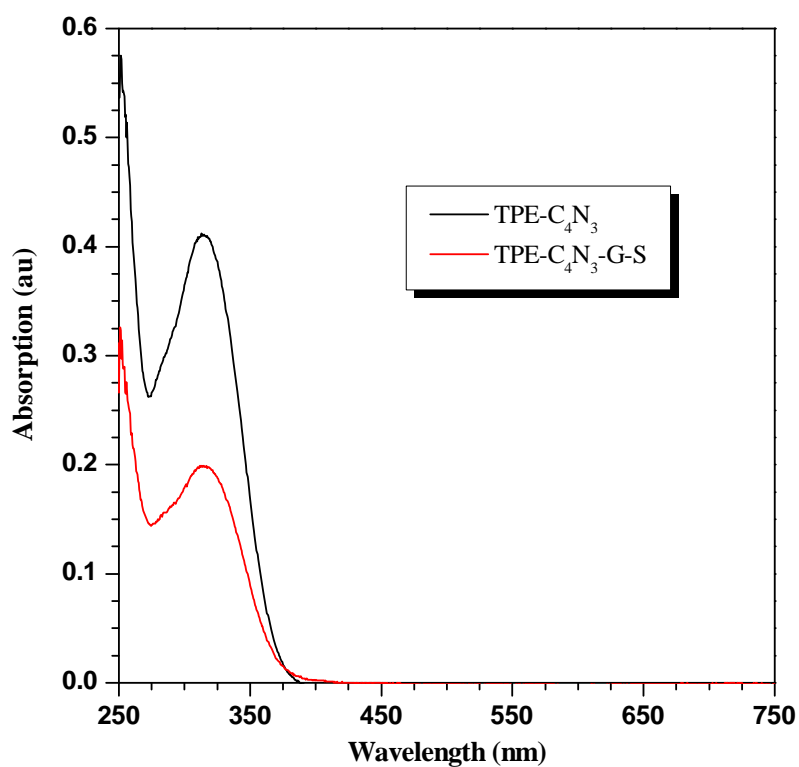

**Figure S11.** UV-vis spectra of **TPE-C<sub>4</sub>N<sub>3</sub>** and **TPE-C<sub>4</sub>N<sub>3</sub>-G-S** in THF.

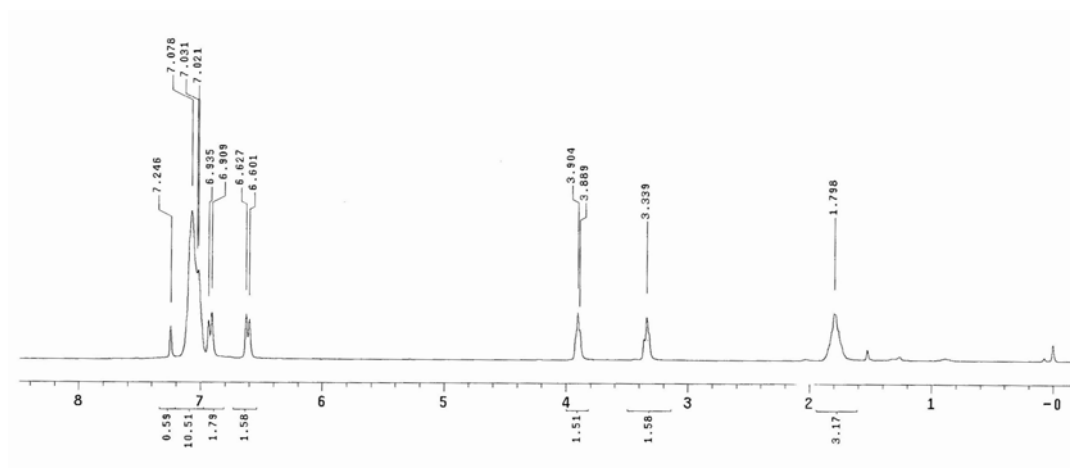

**Figure S12.** <sup>1</sup>H NMR of **TPE-C<sub>4</sub>N<sub>3</sub>**.

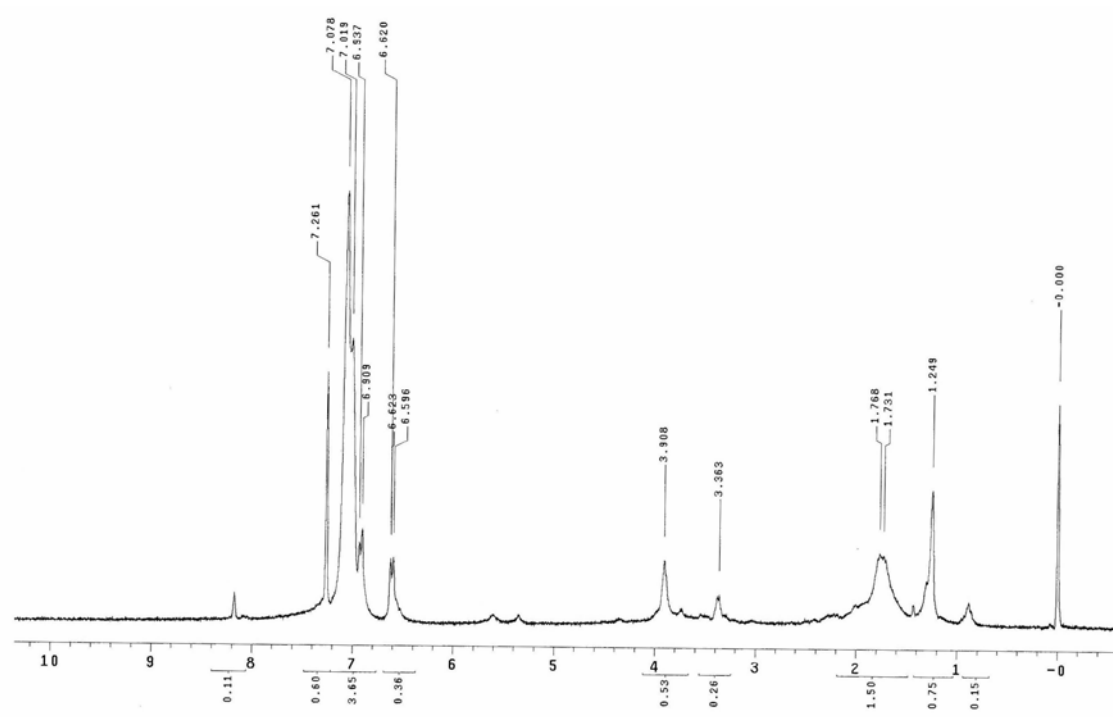

**Figure S13.**  $^1\text{H}$  NMR of TPE- $\text{C}_4\text{N}_3$ -G-S.

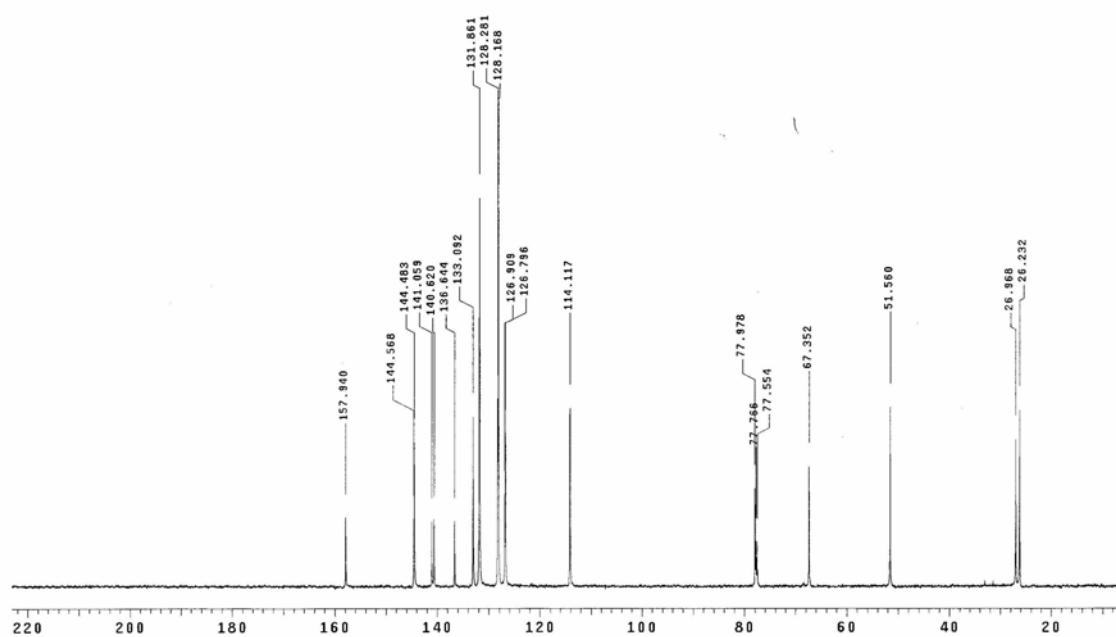

**Figure S14.**  $^{13}\text{C}$  NMR of TPE- $\text{C}_4\text{N}_3$ .

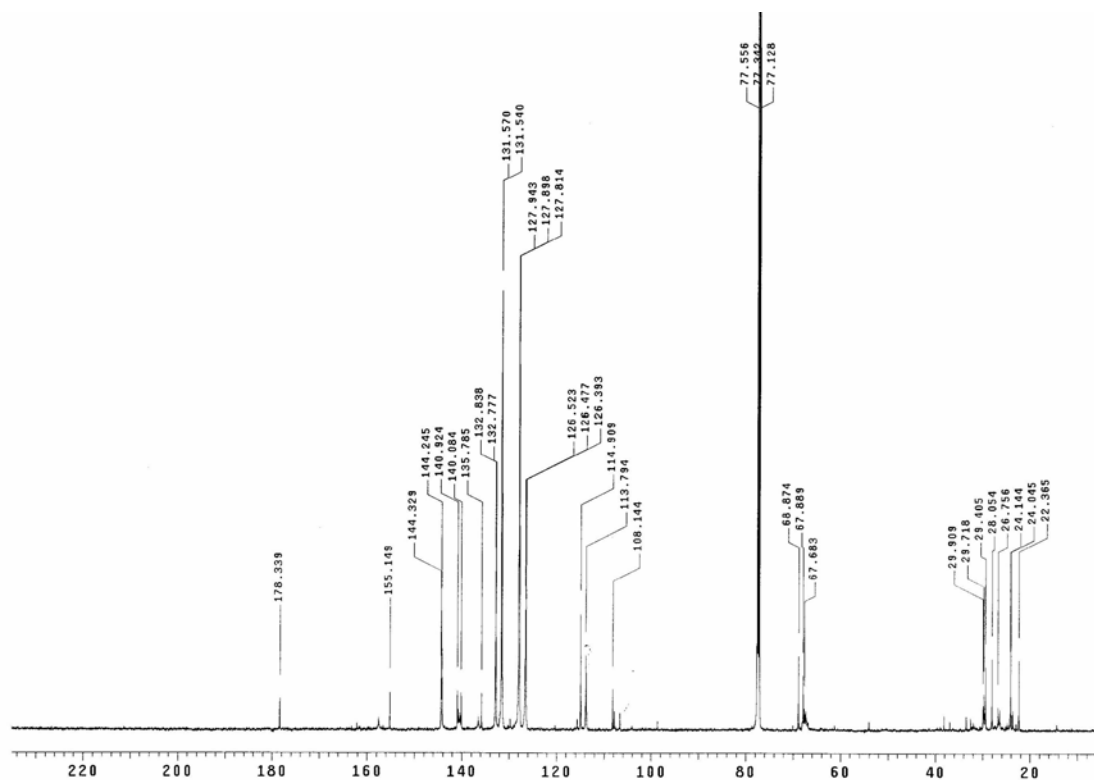

**Figure S15.**  $^{13}\text{C}$  NMR of TPE- $\text{C}_4\text{N}_3$ -G-S.

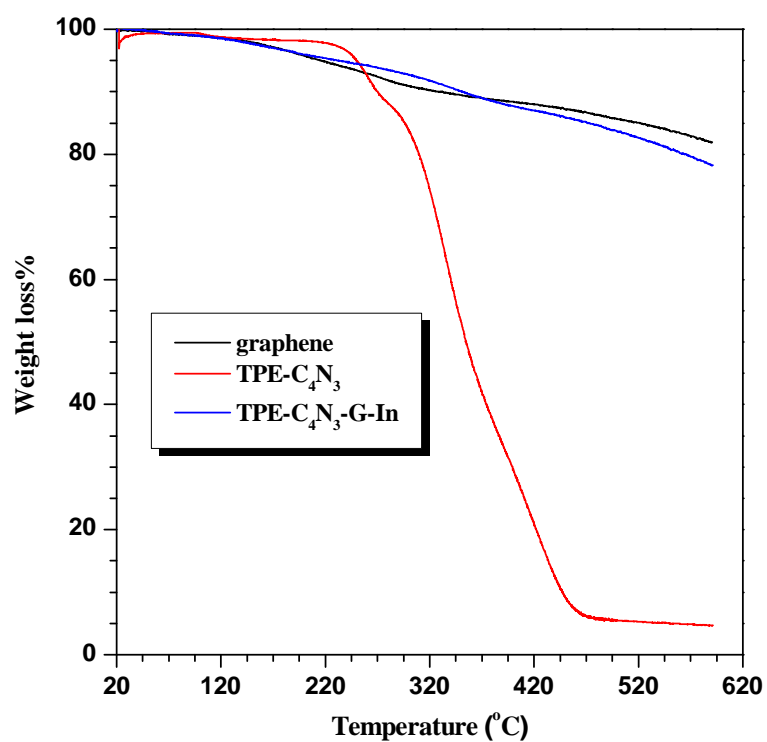

**Figure S16.** Thermo-gravimetric analyses of graphene, TPE- $\text{C}_4\text{N}_3$  and TPE- $\text{C}_4\text{N}_3$ -G-In.

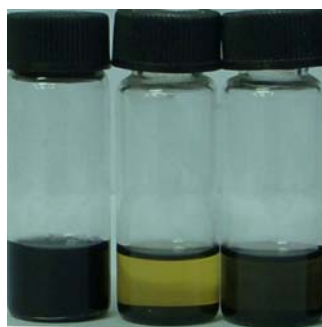

**Figure S17.** Photographs of the reaction system of **TPE-C<sub>4</sub>N<sub>3</sub>-G**, **PB-G** and **TPP-C<sub>4</sub>N<sub>3</sub>-G**, and the photographs were taken after one week.

#### Reference

- (1) Q. Zeng, Z. Li, Y. Dong, C. Di, A. Qin, Y. Hong, L. Ji, Z. Zhu, C. K. W. Jim, G. Yu, Q. Li, Z. Li, Y. Liu, J. Qin and B. Z. Tang, *Chem. Commun.*, 2007, 70-72.
